# Supplementary material for: Rigor of non‐dairy galactose restriction in early childhood, measured by retrospective survey, does not associate with severity of five long‐term outcomes quantified in 231 children and adults with classic galactosemia
Source: Springer Nature journal article supplement (doi:10.1007/s10545-017-0067-x), 2017-07-10
Supplement: MOESM1 [file 13291982]

**Frederick et al Supplemental Table 1:** Averages and standard deviations of 3 outcome measures included in this study.

| <b>Outcome</b>              | <b>Average ± SD<br/>for all patients<br/>(n=322)</b> | <b>Average ± SD<br/>for all controls<br/>(n=114)</b>   | <b>Average ± SD<br/>for patients with<br/>diet information<br/>(n=231)</b> | <b>Average ± SD<br/>for controls with<br/>diet information<br/>(n=71)</b> |
|-----------------------------|------------------------------------------------------|--------------------------------------------------------|----------------------------------------------------------------------------|---------------------------------------------------------------------------|
| <b>Height<br/>(Z-score)</b> |                                                      |                                                        |                                                                            |                                                                           |
| 2-6 yrs                     | -0.910±1.032                                         | -0.281±1.382                                           | -0.854±1.014                                                               | -0.212±1.282                                                              |
| 7-11 yrs                    | -0.873±1.240                                         | -0.116±0.877                                           | -0.795±1.203                                                               | -0.146±0.878                                                              |
| 12-16 yrs                   | -0.903±1.076                                         | 0.072±0.885                                            | -0.926±0.971                                                               | 0.121±0.939                                                               |
| ≥17 yrs                     | -0.227±0.921                                         | 0.188±0.800                                            | -0.249±0.872                                                               | 0.021±0.731                                                               |
| <b>AMH<br/>(ng/mL)</b>      | 0.219±0.709                                          | AMH values not<br>available for this<br>control cohort | 0.197±0.630                                                                | AMH values not<br>available for this<br>control cohort                    |
| <b>ABAS-3<br/>Scores</b>    |                                                      |                                                        |                                                                            |                                                                           |
| Composite                   | 89.279±16.869                                        | 102.023±12.186                                         | 89.252±16.950                                                              | 101.738±12.188                                                            |
| Conceptual                  | 89.510±16.928                                        | 104.047±11.240                                         | 89.612±16.979                                                              | 103.667±11.093                                                            |
| Social                      | 92.933±16.190                                        | 105.465±11.847                                         | 92.845±16.244                                                              | 105.357±11.969                                                            |
| Practical                   | 89.692±16.865                                        | 99.326±12.592                                          | 89.592±16.916                                                              | 99.095±12.653                                                             |
