# Supplementary material for: Rigor of non‐dairy galactose restriction in early childhood, measured by retrospective survey, does not associate with severity of five long‐term outcomes quantified in 231 children and adults with classic galactosemia
Source: Springer Nature journal article supplement (doi:10.1007/s10545-017-0067-x), 2017-07-10
Supplement: MOESM2 [file 13291982]

Frederick et al Supplemental Table 2:  
Covariates that showed evidence of association with outcome measures in the comparison of patients versus controls

| Testing_Framework | Outcome                                                     | Predictor          | Effect    | Pvalue   | Covariate1                             | Effect    | Pvalue   | Covariate2 | Effect    | Pvalue   | Covariate3 | Effect    | Pvalue   | Comment                                                                                                      | Testing_Framework | Testing_Framework |
|-------------------|-------------------------------------------------------------|--------------------|-----------|----------|----------------------------------------|-----------|----------|------------|-----------|----------|------------|-----------|----------|--------------------------------------------------------------------------------------------------------------|-------------------|-------------------|
| GLM, Gaussian     | growth_2_6                                                  | patient vs control | 6.92E-01  | 0.002437 | genderMale                             | 6.03E-01  | 0.002428 | income     | -4.47E-06 | 0.04571  | location   | -1.57E+00 | 0.000141 | Being a control is strongly associated with being larger                                                     | GLM, Gaussian     | GLM, Gaussian     |
| GLM, Gaussian     | growth_7_11                                                 | patient vs control | 8.16E-01  | 0.000234 | genderMale                             | 6.27E-01  | 0.001965 |            |           |          |            |           |          | Being a control is strongly associated with being larger                                                     | GLM, Gaussian     | GLM, Gaussian     |
| GLM, Gaussian     | growth_12_16                                                | patient vs control | 0.8967    | 0.000247 | genderMale                             | 0.681     | 0.001997 |            |           |          |            |           |          | Being a control is strongly associated with being larger                                                     | GLM, Gaussian     | GLM, Gaussian     |
| GLM, Gaussian     | growth_17                                                   | patient vs control | 0.4054    | 0.00983  | genderMale                             | 0.3161    | 0.03429  |            |           |          |            |           |          | Being a control is weakly associated with being larger                                                       | GLM, Gaussian     | GLM, Gaussian     |
| GLM, Gaussian     | AMH                                                         | patient vs control |           |          | predicted residual_GALT activity ≥0.4% |           |          |            |           |          |            |           |          | Not Testable (AMH not available for controls)                                                                | GLM, Gaussian     | GLM, Gaussian     |
| GLM, Gaussian     | ABAS-3 Composite Score                                      | patient vs control | 1.20E+01  | 3.42E-05 | income                                 | 1.33E-04  | 9.07E-05 |            |           |          |            |           |          | Being a control is strongly associated with higher composite scores                                          | GLM, Gaussian     | GLM, Gaussian     |
| GLM, Gaussian     | ABAS-3 Conceptual Sub-Score                                 | patient vs control | 1.38E+01  | 3.22E-06 | income                                 | 1.29E-04  | 9.67E-04 | education  | 9.80E-02  | 9.54E-01 |            |           |          | Being a control is strongly associated with higher conceptual sub-scores                                     | GLM, Gaussian     | GLM, Gaussian     |
| GLM, Gaussian     | ABAS-3 Social Sub-Score                                     | patient vs control | 1.16E+01  | 3.96E-05 | income                                 | 1.17E-04  | 1.89E-03 | location   | -9.51E+00 | 2.23E-02 | education  | 2.37E-01  | 0.88498  | Being a control is strongly associated with higher social sub-scores                                         | GLM, Gaussian     | GLM, Gaussian     |
| GLM, Gaussian     | ABAS-3 Practical Sub-Score                                  | patient vs control | 8.89E+00  | 1.99E-03 | income                                 | 1.27E-04  | 1.96E-04 |            |           |          |            |           |          | Being a control is strongly associated with higher practical sub-scores                                      | GLM, Gaussian     | GLM, Gaussian     |
| GLM, Binomial     | Received speech therapy?                                    | patient vs control | -3.90E+00 | 0.000124 |                                        |           |          |            |           |          |            |           |          | Being a control is strongly associated with not receiving speech therapy                                     | GLM, Binomial     | GLM, Binomial     |
| GLM, Binomial     | Received special educational services other than for speech | patient vs control | -2.97E+00 | 5.74E-05 | income                                 | -6.95E-06 | 5.60E-02 |            |           |          |            |           |          | Being a control is strongly associated with not receiving special educational services other than for speech | GLM, Binomial     | GLM, Binomial     |

race\_ethnicity, income, education, residual\_activity, location, gender were individually tested against all outcomes. They were included in the final model if and only if they were individually significant.
