# Supplementary material for: Rigor of non‐dairy galactose restriction in early childhood, measured by retrospective survey, does not associate with severity of five long‐term outcomes quantified in 231 children and adults with classic galactosemia
Source: Springer Nature journal article supplement (doi:10.1007/s10545-017-0067-x), 2017-07-10
Supplement: MOESM4 [file 13291982]

Frederick et al Supplemental Table 4:  
Covariates that showed evidence of association with outcome measures in the comparison of patients by diet when 1-5 years old

| Testing_Framework | Outcome                                                     | Predictor | Effect    | Pvalue   | Covariate1        | Effect    | Pvalue   | Covariate2 | Effect    | Pvalue  | Covariate3 | Effect    | Pvalue  | Comment                                                                                                      | Testing_Framework | Testing_Framework |
|-------------------|-------------------------------------------------------------|-----------|-----------|----------|-------------------|-----------|----------|------------|-----------|---------|------------|-----------|---------|--------------------------------------------------------------------------------------------------------------|-------------------|-------------------|
| GLM, Gaussian     | growth_2_6                                                  | diet_1_5  | 9.52E-02  | 0.49684  | genderMale        | 7.13E-01  | 0.00138  | income     | -5.21E-06 | 0.0361  | location   | -3.07E-01 | 0.48793 |                                                                                                              | GLM, Gaussian     | GLM, Gaussian     |
| GLM, Gaussian     | growth_7_11                                                 | diet_1_5  | 1.69E-01  | 0.33216  | genderMale        | 7.94E-01  | 0.00467  |            |           |         |            |           |         |                                                                                                              | GLM, Gaussian     | GLM, Gaussian     |
| GLM, Gaussian     | growth_12_16                                                | diet_1_5  | -0.1548   | 0.328514 | genderMale        | 0.8601    | 0.002101 |            |           |         |            |           |         |                                                                                                              | GLM, Gaussian     | GLM, Gaussian     |
| GLM, Gaussian     | growth_17                                                   | diet_1_5  | -0.24567  | 0.0349   | genderMale        | 0.30192   | 0.1464   |            |           |         |            |           |         | Stricter diet is nominally associated with being smaller                                                     | GLM, Gaussian     | GLM, Gaussian     |
| GLM, Gaussian     | AMH                                                         | diet_1_5  | -0.1117   | 0.197    | residual_activity | 0.8891    | 1.21E-05 |            |           |         |            |           |         | Predicted residual GALT activity $\geq 0.4\%$ is strongly associated with higher AMH; diet doesn't associate | GLM, Gaussian     | GLM, Gaussian     |
| GLM, Gaussian     | ABAS-3 Composite Score                                      | diet_1_5  | 8.08E-02  | 0.96882  | income            | 1.30E-04  | 0.00248  |            |           |         |            |           |         |                                                                                                              | GLM, Gaussian     | GLM, Gaussian     |
| GLM, Gaussian     | ABAS-3 Conceptual Sub-Score                                 | diet_1_5  | 2.93E-01  | 0.8896   | income            | 1.22E-04  | 0.0132   | education  | 4.99E-01  | 0.8072  |            |           |         |                                                                                                              | GLM, Gaussian     | GLM, Gaussian     |
| GLM, Gaussian     | ABAS-3 Social Sub-Score                                     | diet_1_5  | 1.86E-01  | 0.92513  | income            | 1.16E-04  | 0.01181  | location   | -1.36E+01 | 0.00845 | education  | -1.04E-01 | 0.95755 |                                                                                                              | GLM, Gaussian     | GLM, Gaussian     |
| GLM, Gaussian     | ABAS-3 Practical Sub-Score                                  | diet_1_5  | -1.18E-01 | 0.95463  | income            | 1.27E-04  | 0.00305  |            |           |         |            |           |         |                                                                                                              | GLM, Gaussian     | GLM, Gaussian     |
| GLM, Binomial     | Received speech therapy?                                    | diet_1_5  | 3.58E-01  | 0.1023   | residual_activity | -8.42E-01 | 0.0671   |            |           |         |            |           |         | Predicted residual GALT activity $\geq 0.4\%$ is weakly associated with not receiving speech therapy         | GLM, Binomial     | GLM, Binomial     |
| GLM, Binomial     | Received special educational services other than for speech | diet_1_5  | 1.26E-01  | 0.506    | income            | -5.74E-06 | 0.119    |            |           |         |            |           |         |                                                                                                              | GLM, Binomial     | GLM, Binomial     |

race\_ethnicity, income, education, residual\_activity, location, gender were individually tested against all outcomes. They were included in the final model if and only if they were individually significant.
